# Supplementary material for: Dextran stabilized lanthanum strontium manganese oxide nanoparticles for magnetic resonance imaging
Source: Royal Society of Chemistry journal article supplement (doi:10.1039/c3ra40836a), 2013-01-01
Supplement: c3ra40836a.pdf [file c3ra40836a.pdf]

## Supporting Information:

# Dextran Stabilized Lanthanum Strontium Manganese Oxide Nanoparticles for Magnetic Resonance Imaging

Reihaneh Haghniaz<sup>a</sup>, Kavita R. Bhayani<sup>a</sup>, Rinku D. Umrani<sup>a</sup> and Kishore M. Paknikar<sup>a\*</sup>

## 1. Zeta Potential

a)

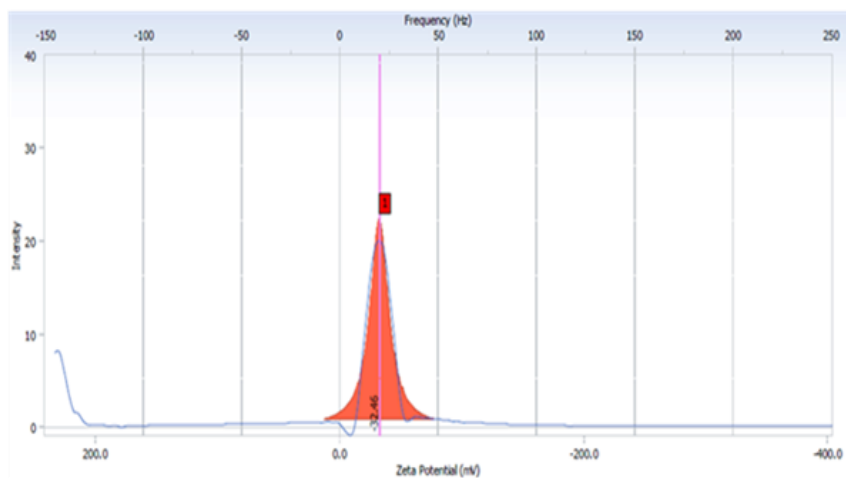

b)

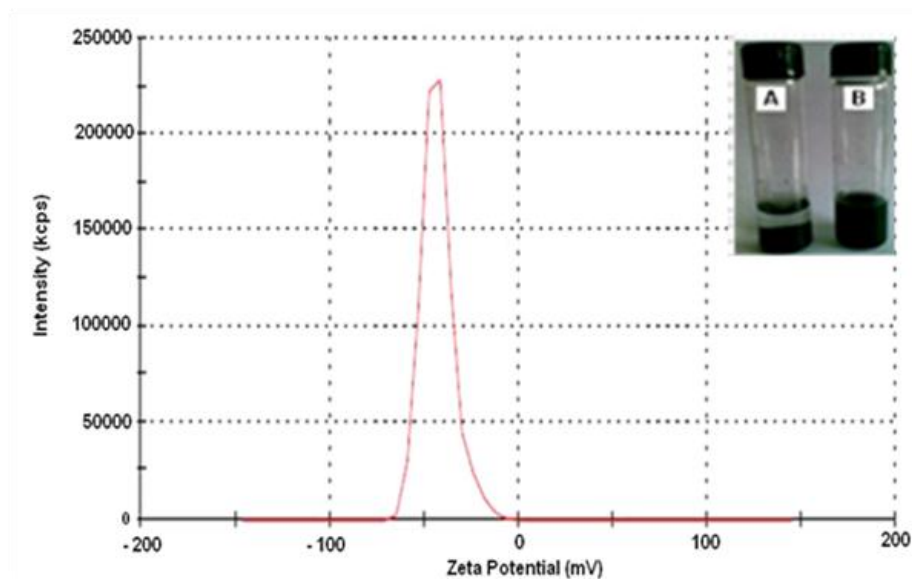

**Fig. S1** a) Zeta Potential measurement using dynamic laser light scattering shows -32.64 mV potential of LSMO nanoparticles dispersed in distilled water b) Zeta Potential measurement shows -42 mV potential of Dex-LSMO nanoparticles dispersed in distilled water. Inset shows images A) bare LSMO nanoparticles agglomeration and settlement B) the homogenous suspension of Dex-LSMO nanoparticles dispersed in aqueous medium.

## 2. Thermogravimetric analysis

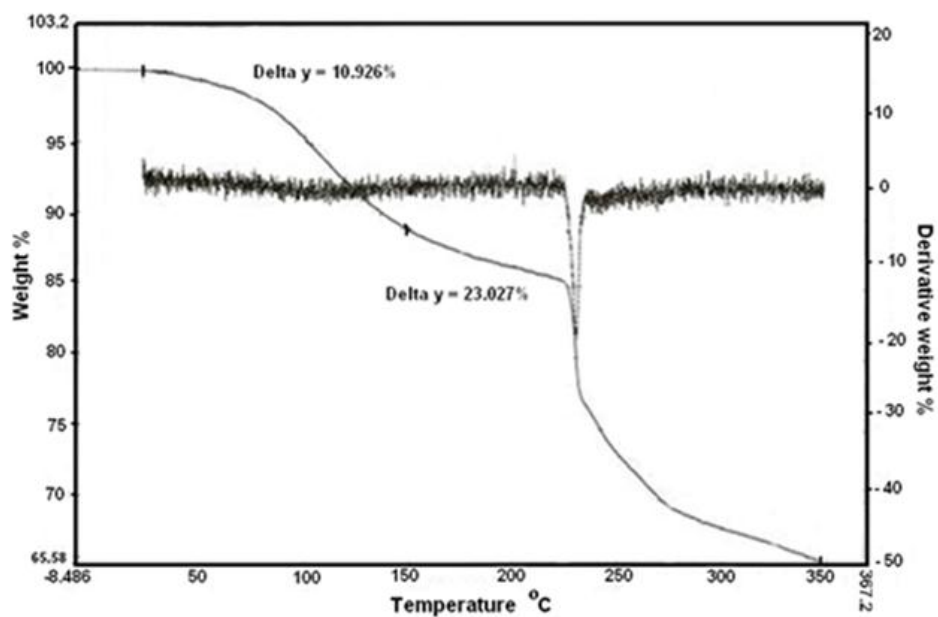

**Fig.S2** Thermogravimetric analysis of Dex-LSMO nanoparticles showing two weight loss steps between 25 to 150°C and 150°C to 350°C with weight losses of 10.926% and 23.027%, respectively.

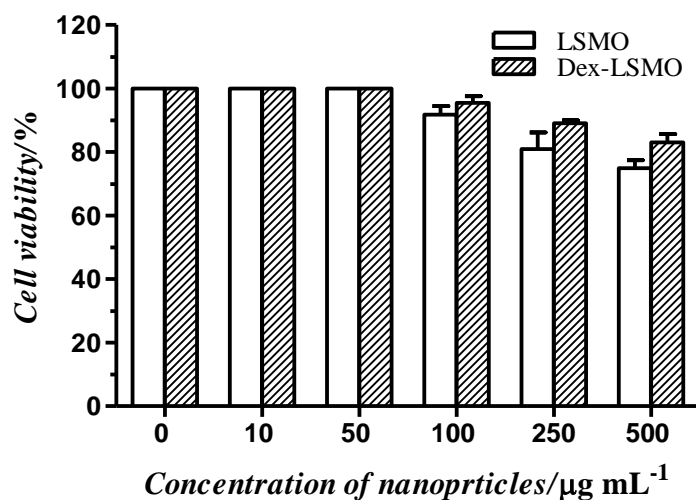

**Fig.S3** *In vitro* cell viability of B16F1 cell exposed to different concentrations of LSMO and Dex-LSMO nanoparticles for 24 h.

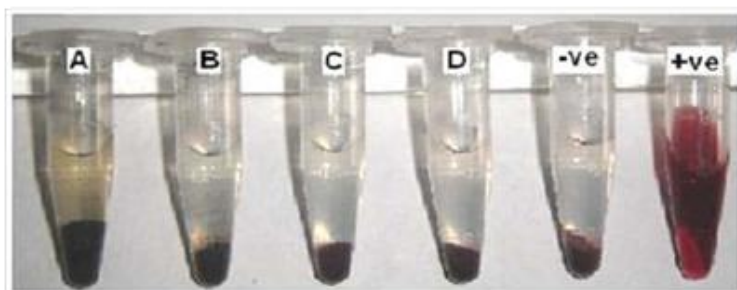

**Fig S4.** Hemolysis test for Dex-LSMO NPs at concentrations of  $200 \text{ mg mL}^{-1}$  (A),  $30 \text{ mg mL}^{-1}$  (B),  $5 \text{ mg mL}^{-1}$  (C) and  $1 \text{ mg mL}^{-1}$  (D), PEG and TritonX-100 have been used as Negative control (-Ve) and positive control (+Ve), respectively.
